# Supplementary material for: Genome-Wide Identification of BrCAX Genes and Functional Analysis of BrCAX1 Involved in Ca2+ Transport and Ca2+ Deficiency-Induced Tip-Burn in Chinese Cabbage (Brassica rapa L. ssp. pekinensis)
Source: MDPI journal article supplement (doi:10.3390/genes14091810), 2023-09-17
Supplement: s1 [file s1]

**Table S1 CAX homologous proteins used for phylogenetic analysis**

| Gene name | Gene ID       | Gene name | Gene ID     |
|-----------|---------------|-----------|-------------|
| AtCAX1    | AT2G38170     | BolCAX1-1 | Bol017767   |
| AtCAX2    | AT3G13320     | BolCAX1-2 | Bol025283   |
| AtCAX3    | AT3G51860     | BolCAX2-1 | Bol015803   |
| AtCAX4    | AT5G01490     | BolCAX2-2 | Bol035523   |
| AtCAX5    | AT1G55730     | BolCAX2-3 | Bol040372   |
| BnaCAX1-1 | BnaA04g21850D | BolCAX3   | Bol004999   |
| BnaCAX1-2 | BnaA05g06490D | BolCAX4   | Bol000685   |
| BnaCAX1-3 | BnaC04g07160D | BolCAX5-1 | Bol013325   |
| BnaCAX1-4 | BnaC04g45720D | BolCAX5-2 | Bol035229   |
| BnaCAX2-1 | BnaA01g29870D | RsaCAX1-1 | Rsa10020334 |
| BnaCAX2-2 | BnaA03g32760D | RsaCAX1-2 | Rsa10038932 |
| BnaCAX2-3 | BnaA05g26020D | RsaCAX2   | Rsa10034738 |
| BnaCAX2-4 | BnaC01g37750D | RsaCAX3   | Rsa10018075 |
| BnaCAX2-5 | BnaC03g37860D | RsaCAX4   | Rsa10008014 |
| BnaCAX2-6 | BnaC05g40050D | RsaCAX5-1 | Rsa10012211 |
| BnaCAX3-1 | BnaC07g32560D | RsaCAX5-2 | Rsa10029090 |
| BnaCAX3-2 | BnaA03g41510D | AlCAX1    | AL4G35190   |
| BnaCAX4-1 | BnaCnng03980D | AlCAX2    | AL3G25140   |
| BnaCAX4-2 | BnaA10g27650D | AlCAX3    | AL5G32320   |
| BnaCAX5-1 | BnaA08g00350D | AlCAX4    | AL6G10580   |
| BnaCAX5-2 | BnaC03g70750D | AlCAX5    | AL1G63780   |
| BnaCAX5-3 | BnaC06g11060D | –         | –           |

**Table S2 Specific primers used in this study**

| Primer                                  | Sequence (5'-3') forward                       | Sequence (5'-3') reverse                       |
|-----------------------------------------|------------------------------------------------|------------------------------------------------|
| qRT-PCR analysis                        |                                                |                                                |
| BrCAX1-1                                | GTAATCCAGAAGGTTCCATA                           | CCGCAATAAGTTCCGATA                             |
| BrCAX1-2                                | ATCGCTTACATCGCATAT                             | TACTCGTCATCCTCATCT                             |
| BrCAX2-1                                | TCGGCTAATGAAGTTGAG                             | AAGGTAGTAACAGGTTGAG                            |
| BrCAX2-2                                | CGCTTATCTCTTCTTCCA                             | ATCTTCATCTTCACCACAA                            |
| BrCAX2-3                                | GACGAGAAGAAGACGATT                             | CAATGGTGTAATGCCTATT                            |
| BrCAX3                                  | TGCTTATTGCTTACATTGC                            | AACGGTCACTTCATCATT                             |
| BrCAX4                                  | GTGAGTGACAAGGAAGAA                             | ATAGTGGAGACAAGGTAGT                            |
| BrCAX5                                  | ACTTCTTCATTACACGCATA                           | CATAGGCAACGAGCATT                              |
| BrCCX3                                  | GGAGTAGCCAAGAGAATG                             | CAAGAGCAGAGCCAATAG                             |
| BrCCX5                                  | TATGCTTGTTGGACTTGG                             | AATCTCGGAACTCGGAAT                             |
| BrEF-1 $\alpha$                         | GCCAAAGAGGCCATCAGACAA                          | ATACCAGGCTTGAGCATACCG                          |
| Amplification of gene sequence          |                                                |                                                |
| BrCAX1-1 (F)                            | GGGGATCGTGCAGGAACA                             | TCGTGAAAAGACTCAGGGA                            |
| BrCAX1-1 (B)                            | GAGACCTCTGCTGATTTAA                            | TTAAGATGAGAAAACCTCTCG                          |
| BrCAX1-2 (F)                            | ATGGCGGGGATCGTTGAA                             | TCCCTTCGGAGATTAGCA                             |
| BrCAX1-2 (B)                            | AAAGTCGCAGTGGTAAAG                             | TTAAGATGAGAAAACGCCTTCG                         |
| Construction of yeast expression vector |                                                |                                                |
| BrCAX1-1                                | AGTGGATCCCCCGGGCTGCAGATGGCGGGGATCGTGCAG        | GGGCCCCCCCCTCGAGGTCGACTTAAGATGAGAAAACCTCTTCGCC |
| BrCAX1-1-N                              | AGTGGATCCCCCGGGCTGCAGATGTCTTCTTCTTCGTTGAGGAAGA | GGGCCCCCCCCTCGAGGTCGACTTAAGATGAGAAAACCTCTTCGCC |
| BrCAX1-2                                | AGTGGATCCCCCGGGCTGCAGATGGCGGGGATCGTTGAA        | GGGCCCCCCCCTCGAGGTCGACTTAAGATGAGAAAACGCCTTCGC  |
| BrCAX1-2-N                              | AGTGGATCCCCCGGGCTGCAGATGTCTTCTTCTTCGTTGAGGAAGA | GGGCCCCCCCCTCGAGGTCGACTTAAGATGAGAAAACGCCTTCGC  |
| Construction of GFP expression vector   |                                                |                                                |

|                  |                                                         |                                                     |
|------------------|---------------------------------------------------------|-----------------------------------------------------|
| BrCAX1-1-N       | ATTTGGAGAGGACAG <u>GGTACC</u> ATGTCTTCTTCTTCGTTGAGGAAGA | AGCTCCTCCTCCTCCT <u>CTAGA</u> AGATGAGAAAACCTTCGCCG  |
| BrCAX1-2-N       | ATTTGGAGAGGACAG <u>GGTACC</u> ATGTCTTCTTCTTCGTTGAGGAAGA | AGCTCCTCCTCCTCCT <u>CTAGA</u> AGATGAGAAAACGCCTTCGCC |
| <hr/>            |                                                         |                                                     |
| AS-ODN treatment |                                                         |                                                     |
| BrCAX1-1-S       | TTTACTCCTAATGGGACTGT                                    | -                                                   |
| BrCAX1-1-AS      | ACAGTCCCATTAGGAGTAAA                                    | -                                                   |
| BrCAX1-2-S       | CCGATGTGAACTTCTTCTTA                                    | -                                                   |
| BrCAX1-2-AS      | TAAGAAGAAGTTCACATCGG                                    | -                                                   |

Note: F, the front end sequence; B, the back end sequence; N, the N-terminal truncated sequence. The underlines represent the restriction sites.

**Table S3 Information of *BrCAX* family genes in Chinese cabbage**

| Gene name | Nucleotide ID  | Protein ID     | CDS length | DNA sequence length | Molecular weight | Theoretical pI | Instability index | Aliphatic index | Grand average of hydropathicity | Number of TM region |
|-----------|----------------|----------------|------------|---------------------|------------------|----------------|-------------------|-----------------|---------------------------------|---------------------|
| BrCAX1-1  | XM_009143477.3 | XP_009141725.1 | 1398       | 3478                | 50327.84         | 5.50           | 33.15             | 122.30          | 0.589                           | 11                  |
| BrCAX1-2  | XM_009145168.3 | XP_009143416.1 | 1398       | 3857                | 50321.77         | 5.52           | 33.23             | 120.24          | 0.561                           | 11                  |
| BrCAX2-1  | XM_009126491.3 | XP_009124739.1 | 1419       | 2280                | 51431.24         | 5.09           | 40.50             | 114.64          | 0.565                           | 11                  |
| BrCAX2-2  | XM_009148286.3 | XP_009146534.1 | 1326       | 2167                | 48326.67         | 4.86           | 39.01             | 114.33          | 0.586                           | 11                  |
| BrCAX2-3  | XM_009137048.3 | XP_009135296.1 | 1494       | 2904                | 54679.70         | 5.40           | 39.32             | 107.89          | 0.427                           | 11                  |
| BrCAX3    | XM_033288881.1 | XP_033144772.1 | 1278       | 6739                | 45970.04         | 5.32           | 38.65             | 128.07          | 0.661                           | 11                  |
| BrCAX4    | XM_009124602.3 | XP_009122850.1 | 1566       | 4346                | 57536.43         | 9.21           | 47.59             | 111.00          | 0.365                           | 11                  |
| BrCAX5    | XM_009108586.3 | XP_009106834.1 | 1236       | 2178                | 45189.98         | 5.02           | 33.86             | 119.32          | 0.643                           | 11                  |

**Table S4 Expression levels of *BrCAX* genes in different tissues and under heat stress**

| Gene name | FPKM value |        |        |         |         |         |         |        | Probe intensity (PI) value under 45 °C stress |           |           |           |           |           |
|-----------|------------|--------|--------|---------|---------|---------|---------|--------|-----------------------------------------------|-----------|-----------|-----------|-----------|-----------|
|           | Root 1     | Root 2 | Stem   | Leaf 1  | Leaf 2  | Flower  | Silique | Callus | 0 h                                           | 0.5 h     | 1 h       | 2 h       | 3 h       | 4 h       |
| BrCAX1-1  | 10.147     | 7.963  | 11.561 | 150.601 | 145.783 | 181.616 | 43.239  | 44.906 | 26325.400                                     | 14161.200 | 14991.600 | 13305.800 | 12261.800 | 13807.000 |
| BrCAX1-2  | 3.877      | 2.871  | 47.972 | 130.664 | 113.405 | 36.708  | 20.376  | 4.302  | 2262.780                                      | 1761.760  | 1464.160  | 1677.450  | 1038.040  | 1430.560  |
| BrCAX2-1  | 12.976     | 10.905 | 4.905  | 3.954   | 3.776   | 2.466   | 3.145   | 20.266 | 1197.530                                      | 849.109   | 1016.310  | 781.599   | 932.940   | 780.350   |
| BrCAX2-2  | 9.997      | 9.633  | 6.263  | 6.366   | 5.653   | 3.999   | 1.133   | 4.287  | 471.360                                       | 543.554   | 605.126   | 609.848   | 565.135   | 607.356   |
| BrCAX2-3  | 21.028     | 17.325 | 13.556 | 13.961  | 11.886  | 7.985   | 12.522  | 11.133 | 3962.340                                      | 2212.110  | 2185.230  | 2086.810  | 1734.030  | 1752.040  |
| BrCAX3    | 4.485      | 4.996  | 2.141  | 2.468   | 1.625   | 12.241  | 66.067  | 46.238 | 1673.860                                      | 3163.890  | 2578.230  | 3390.220  | 3919.050  | 5181.600  |
| BrCAX4    | 1.957      | 1.739  | 0.067  | 0.075   | 0.141   | 0.662   | 2.812   | 4.962  | 393.327                                       | 318.474   | 632.359   | 552.413   | 406.801   | 331.258   |
| BrCAX5    | 0.666      | 0.579  | 0.000  | 0.000   | 0.000   | 0.000   | 0.000   | 0.414  | 321.191                                       | 376.524   | 121.941   | 40.456    | 20.379    | 33.164    |
